# Supplementary material for: Molecular Weight Identification of Compounds Involved in the Fungal Synthesis of AgNPs: Effect on Antimicrobial and Photocatalytic Activity
Source: MDPI journal article supplement (doi:10.3390/antibiotics11050622), 2022-05-05
Supplement: s1 [file s1]

# Supplementary Materials

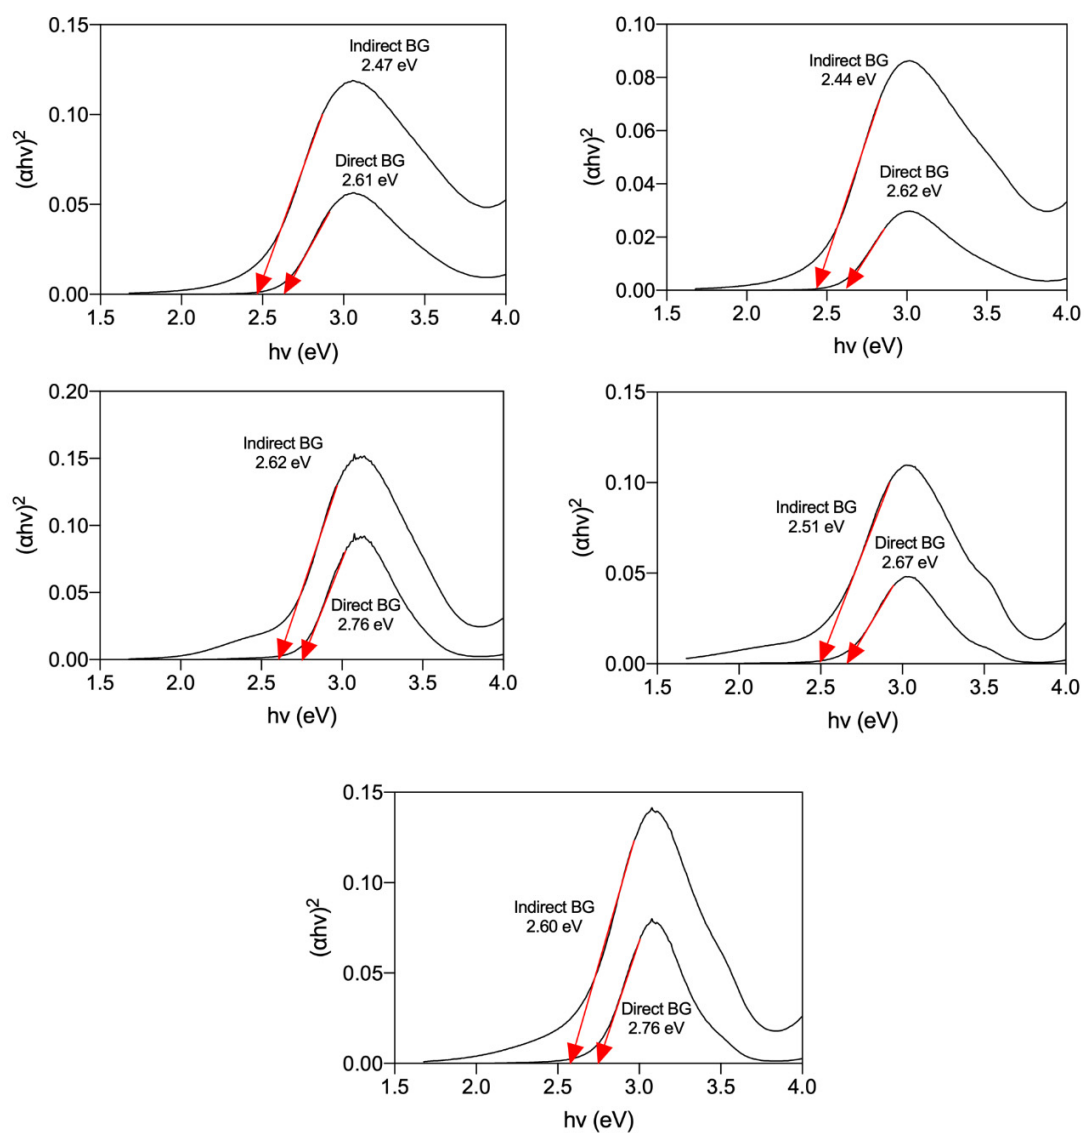

**Figure S1.** Band gap of silver nanoparticles obtained using different mycelia-free water extract fractions.
